# Supplementary material for: Estudios epidemiológicos y enzimológicos en la especie Pseudomonas Aeruginosa
Source: Royal Society of Chemistry journal article supplement (doi:10.1039/c6mb00092d), 1980-01-01

## Electronic supplementary information (ESI)

**Fig. S1** PCA score plot for methods A-F ( $R^2X$  (cum) = 0.903,  $Q^2$  (cum) = 0.635)

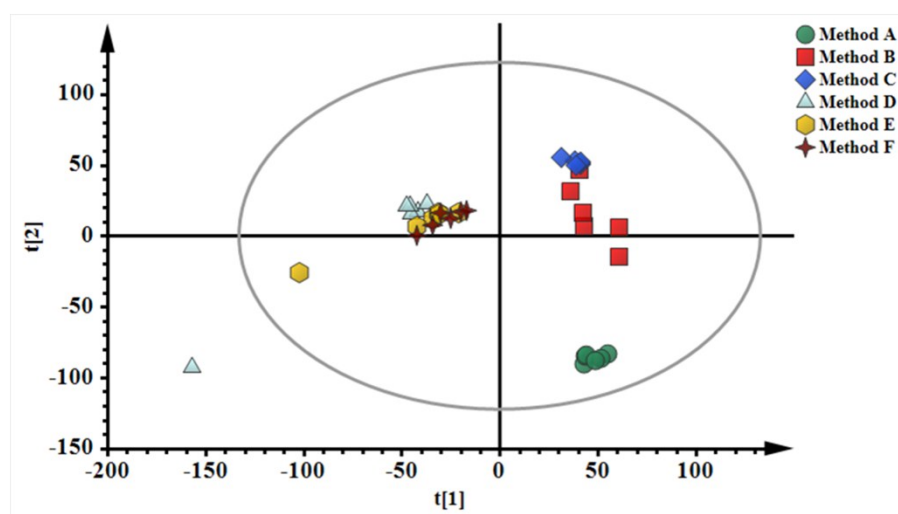

**Fig. S2** Representative base peak intensity (BPI) chromatograms of (+) ESI-MS (A) and (-) ESI-MS (B) from serum samples of Con A-treated mice (upper) and control mice (lower), respectively.

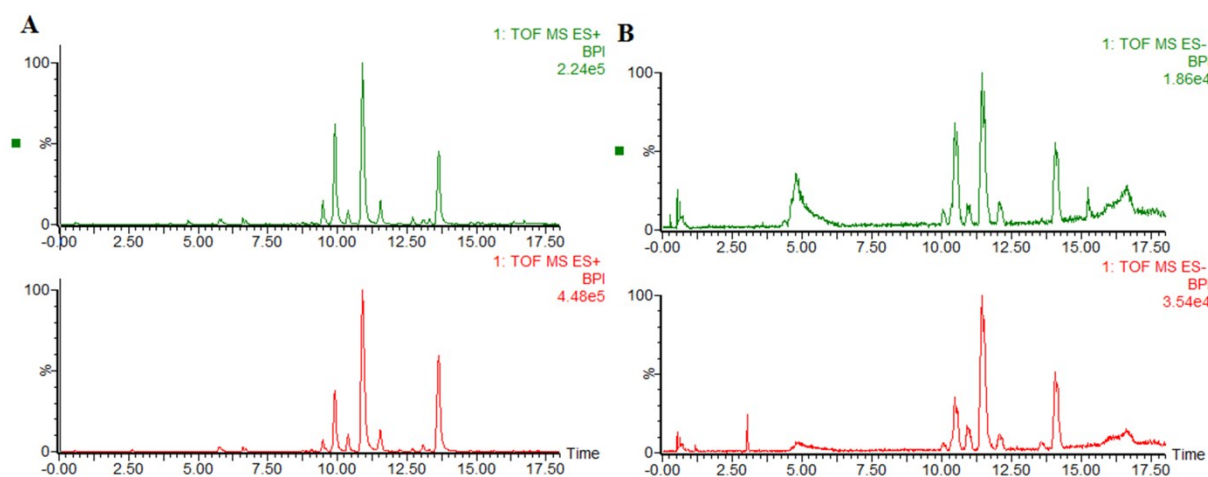

**Fig. S3** VIP values of lysoPCs in PLS-RA model

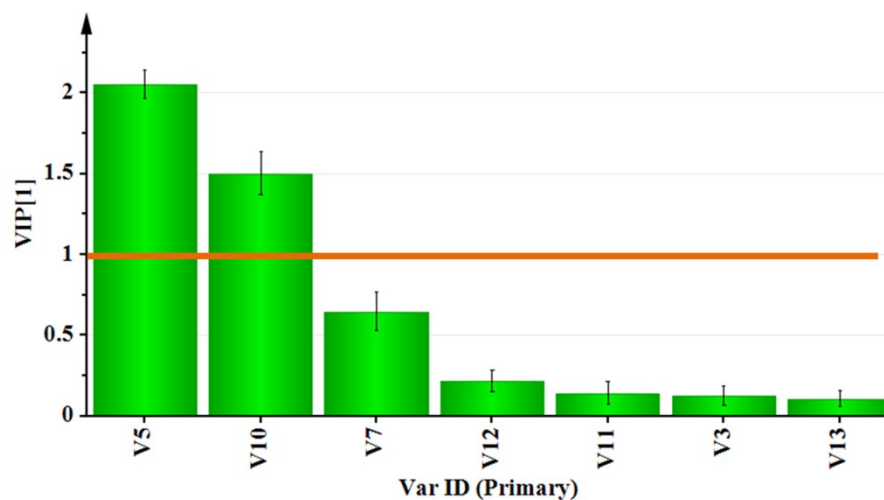

Procedures of the metabolites identification are as follows: first, the quasimolecular ions were confirmed; secondly, the exact masses of the monoisotopic molecular weights were used to search the online databases, such as the Human Metabolome Database (<http://www.hmdb.ca/>), Metlin (<http://metlin.scripps.edu/>) and Mass Bank (<http://www.massbank.jp/>); then, the MS/MS spectra were also analyzed to verify the structure of the identified metabolites, and some of them were further confirmed using reference substances. The glycerophospholipids generally contain a quaternary ammonium salt group and a phosphate ester group. Hence, the fragment ions at  $m/z$  184 ( $[C_5H_{15}NO_4P]^+$ ) and 104 ( $[C_5H_{14}NO]^+$ ) are characteristic ions of glycerophospholipids. And the length of the aliphatic chain is deduced from the accurate mass obtained via high-resolution mass spectrometry. Take lysoPC(18:0) (**V10**) as an example, it showed an accurate mass of  $[M+H]^+$  and  $[M+Na]^+$  at  $m/z$  524.3718 and 546.3541, corresponding to the molecular formula  $C_{26}H_{54}NO_7P$ . Characteristic ions at  $m/z$  184.0743 and 104.1074 were observed, and ion at 506.3609 were originated by the loss of  $H_2O$  (18 Da). By searching from the data base (HMDB), it was tentatively identified as lysoPC(18:0) (**V10**). The mass spectrum of lysoPC(18:0) (**V10**) is presented as **Fig. S4**. Carnitines have the similar skeletons as glycerophospholipids, but ions at  $m/z$  ~184 cannot be found in carnitines due to the lack of phosphate ester group. Therefore, by using this procedure, the structures of three long-chain acylcarnitines and seven glycerophospholipids were determined. Bile acids and bilirubin were validated by reference substance as shown in **Fig. S5-7**.

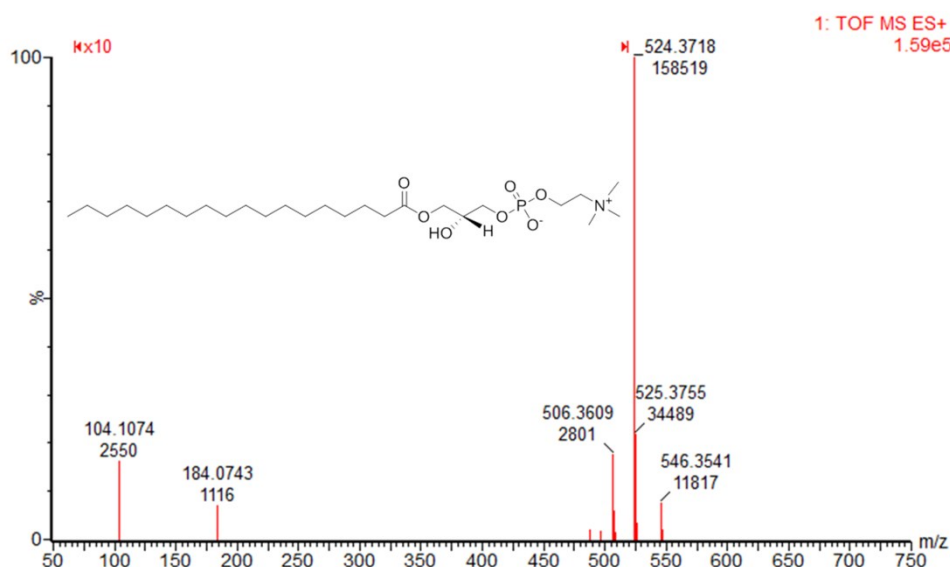

**Fig. S4** Mass spectrum of lysoPC(18:0) (**V10**)

**Fig. S5.** (A) The UPLC-Q-TOF/MS base peak intensity (BPI) of taurocholic acid (**V1**). (B) The extracted ion chromatogram of ion at  $m/z$  514 in a representative sample.

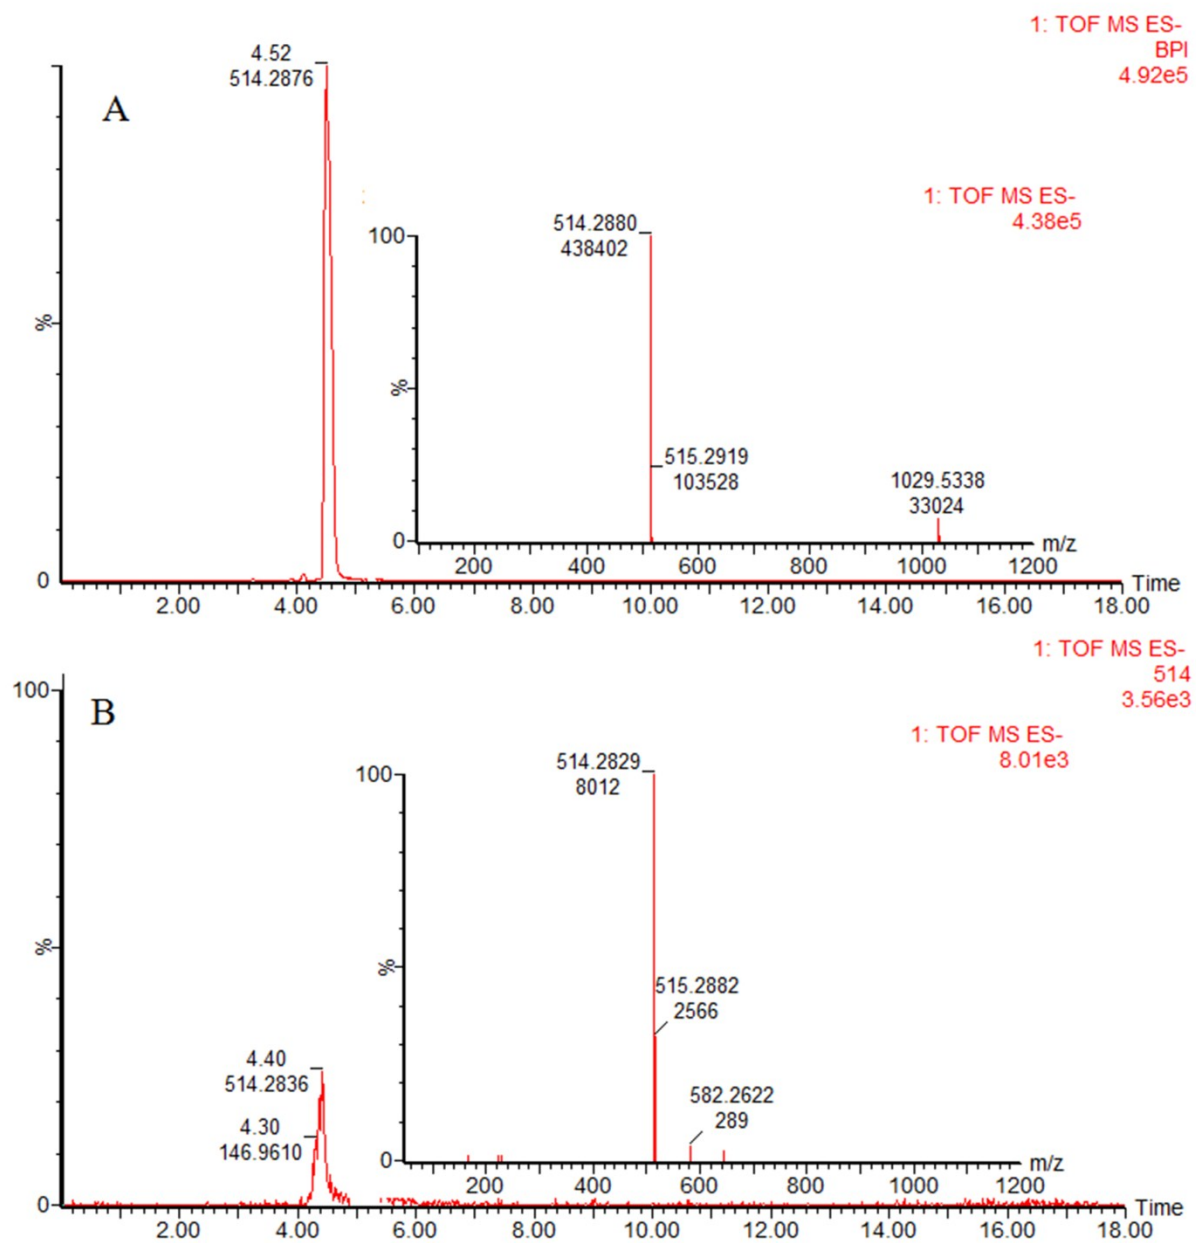

**Fig. S6.** (A) The UPLC-Q-TOF/MS base peak intensity (BPI) of taurochenodeoxycholic acid (**V2**). (B) The extracted ion chromatogram of ion at  $m/z$  498 in a representative sample.

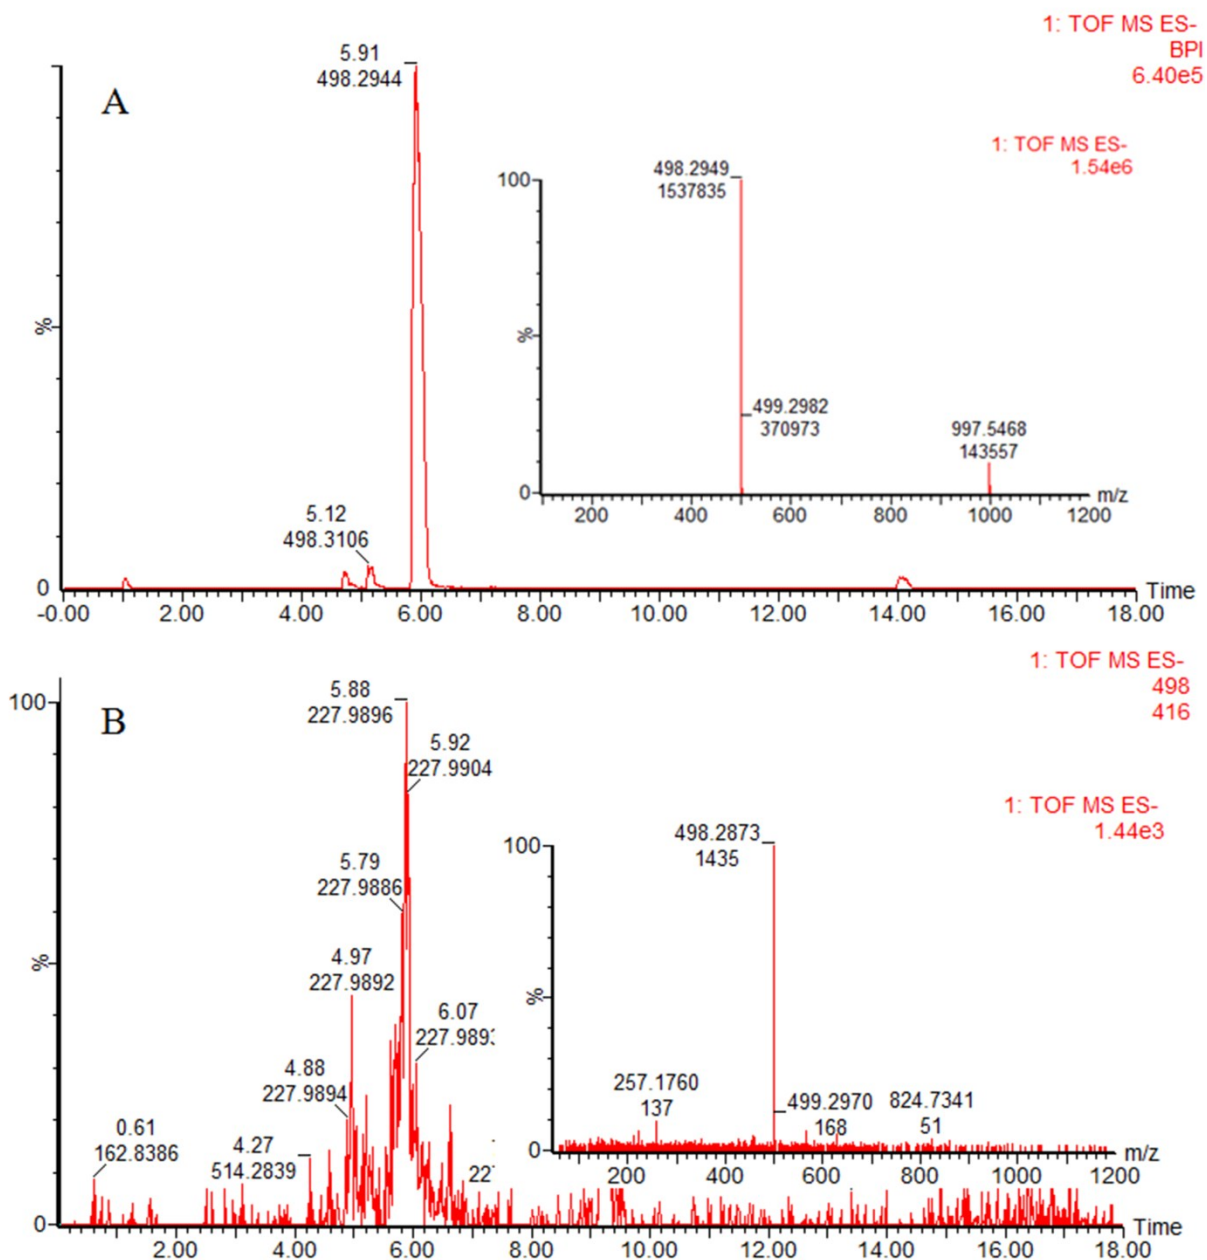

**Fig. S7.** (A) The UPLC-Q-TOF/MS base peak intensity (BPI) of bilirubin (**V14**). (B) The extracted ion chromatogram of ion at  $m/z$  607 in a representative sample.

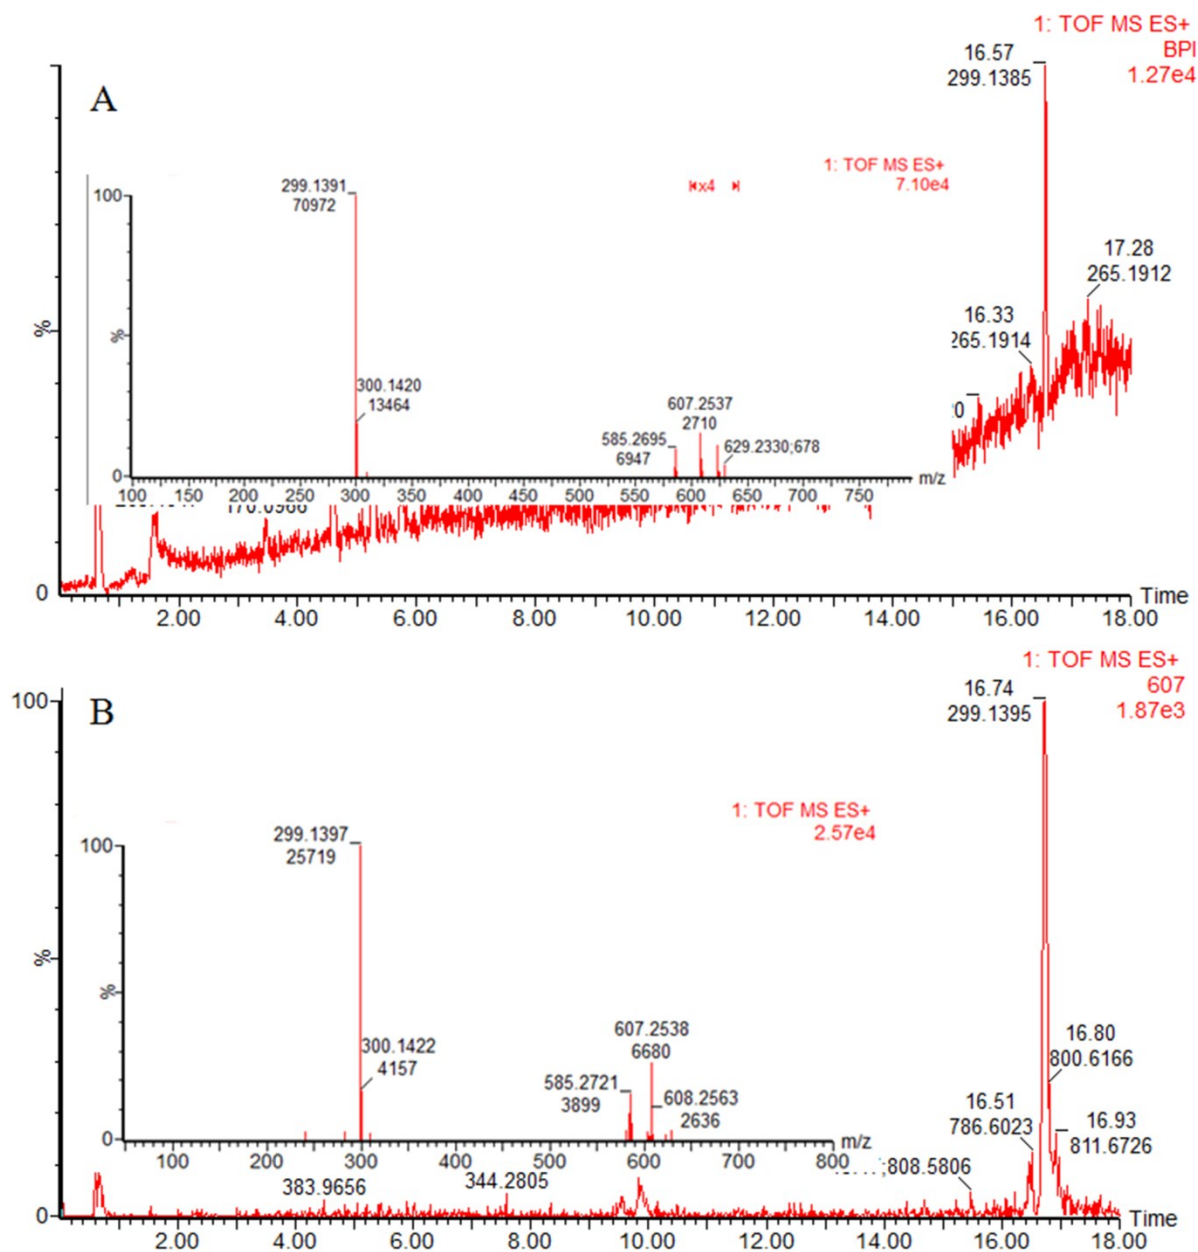

Supplement: c6mb00092d1.pdf [file c6mb00092d1.pdf]
